# Supplementary material for: Lead-start isothermal polymerase amplification controlled by DNAzymatic switches
Source: Royal Society of Chemistry journal article supplement (doi:10.1039/d1nr07894a), 2022-01-01
Supplement: d1nr07894a1.pdf [file d1nr07894a1.pdf]

## Supporting Information

### **Lead-start isothermal polymerase amplification controlled by DNAzymatic switches**

*Hyebin Yoo<sup>a</sup>, Ju Young Lee<sup>b</sup>, Ki Soo Park<sup>c,\*</sup>, and Seung Soo Oh<sup>a,\*</sup>*

<sup>a</sup> Department of Materials Science and Engineering, Pohang University of Science and Technology (POSTECH), Pohang, 37673, South Korea

<sup>b</sup> Research Center for Bio-based Chemistry, Korea Research Institute of Chemical Technology (KRICT), Ulsan, 44429, South Korea

<sup>c</sup> Department of Biological Engineering, Konkuk University, Seoul, 05029, South Korea

\* Corresponding authors.

E-mail address: [akdong486@konkuk.ac.kr](mailto:akdong486@konkuk.ac.kr) (K. S. Park)

E-mail address: [seungsoo@postech.ac.kr](mailto:seungsoo@postech.ac.kr) (S. S. Oh)

## Supplementary Figures and Tables

**Table S1.** Oligonucleotides in this study

| Name                             | DNA Sequence (5' → 3')                                  |
|----------------------------------|---------------------------------------------------------|
| <b>OFF → ON system</b>           |                                                         |
| <b>OFF→ON switch</b>             | GAGTCCAATrAGGAAGAGTCCAATGTACAGTATTGGA                   |
| <b>(optimal locking)</b>         | CTCTGAAGTAGCGCCGCCGTATTGGACTCTTCC                       |
| OFF→OFF switch                   | GCGGCGTCACTATrAGGAAGATCCAATGTACAGTATTG                  |
| <b>(too strong locking)</b>      | GATCTGAAGTAGCGCCGCCGTATAGTGACGCCGC                      |
| ON→ON switch                     | AAGACAATrAGGAAGACAATGTACAGTATTGTCTGAA                   |
| <b>(too weak locking)</b>        | GTAGCGCCGCCGTATTGTCTTC                                  |
| <b>ON → OFF system</b>           |                                                         |
| <b>ON→OFF switch</b>             | CTGTACATTGT rAGGAAGAGCTTTGCTCTGAAGTAGCG                 |
| <b>(optimal unlocking)</b>       | CCGCCGTACAATGTACAGTATTGTACG                             |
| OFF→OFF switch                   | CTGTACATTACT rAGGAAGAGCTTTGCTCTGAAGTAGC                 |
| <b>(too weak unlocking)</b>      | GCCGCCGTAGTAATGTACAGTATTACTACG                          |
| ON→ON switch                     | CGTAATACTGTACATT rAGGAAGAGCTTTGCTCTGAAG                 |
| <b>(too strong unlocking)</b>    | TAGCGCCGCCGTAATGTACAGTATTACG                            |
| <b>DNA templates and primers</b> |                                                         |
| <b>Template</b>                  | CAGAAATCTCAGGGACTCTAAAGCTCAACTTGCATAA<br>ACTTCTGAGGA    |
| <b>FAM-Primer</b>                | FAM-TCCTCAGAAGTTTATGCA                                  |
| <b>COVID-19 Template</b>         | CACATTGGCACCCGCAATCCTGCTAACAATGCTGCAA<br>TCGTGCTACAACCT |

COVID-19 Primer AGTTGTAGCACGATTGCAGC

HPV-16 Template CACTATTTTGGAGGACTGGAATTTTGGTTTACAACCTC  
CTCCAGGAGGCA

HPV-16 Primer TGCCTCCTGGAGGAGGTTGT

The RNA nucleotides were colored in red (rA).

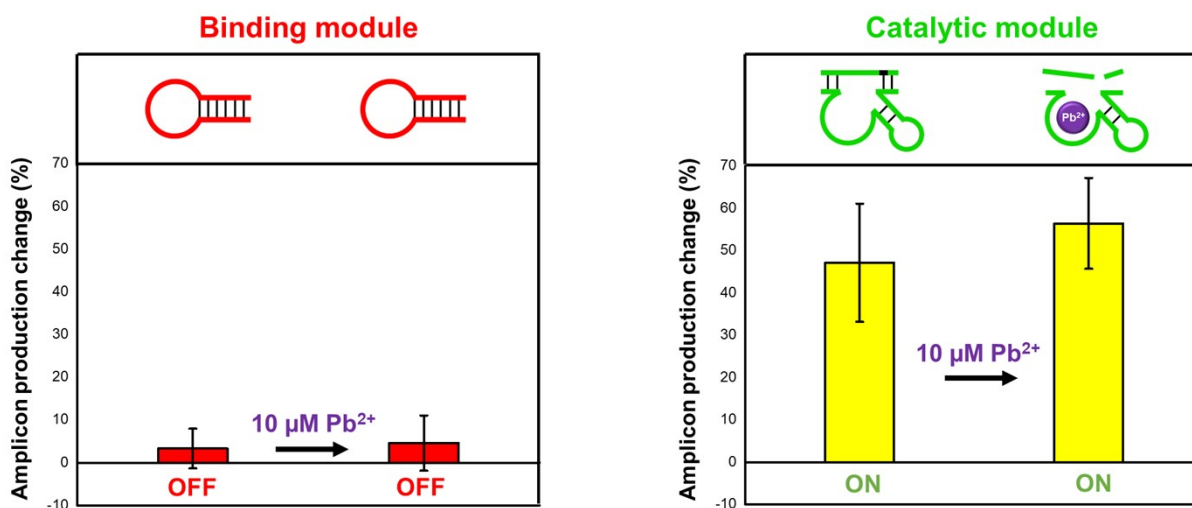

**Fig. S1.** Effects of individual binding and catalytic modules on the activity of DNA polymerase. Regardless of Pb<sup>2+</sup> addition, TQ30 aptamer completely inhibited the DNA polymerase activity. After Pb<sup>2+</sup> addition, GR5 DNAzyme did not change the activity of DNA polymerase significantly.

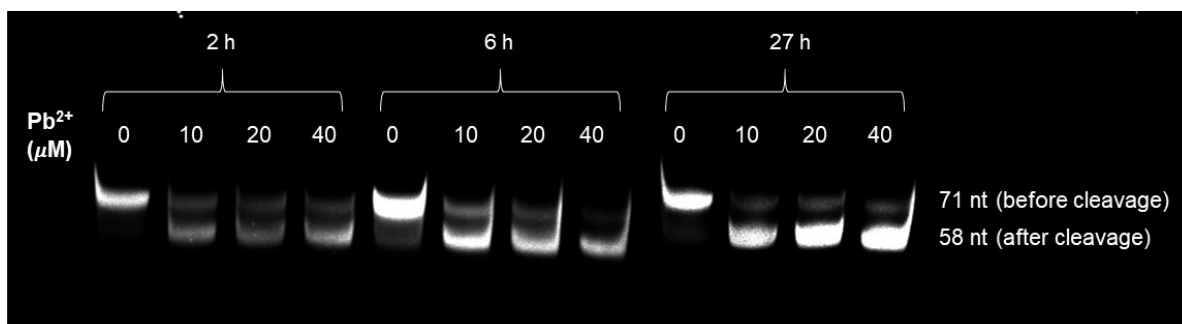

**Fig. S2.** Time-dependent cleavage of GR5 DNAzyme by varying concentrations of  $\text{Pb}^{2+}$ . Original GR5 DNAzyme module with 71-nt length was treated with diverse concentrations of  $\text{Pb}^{2+}$  (0, 10, 20, 40  $\mu\text{M}$ ) and incubated for 2 h, 6 h, and 27 h. When RNA cleavage occurred, the GR5 DNAzyme module became split to be 58-nt and 13-nt which can be clearly distinguished through the PAGE. The GR5 DNAzyme module showed a fast cleavage rate, as 71.6 % of cleavage was carried out within only 2 h upon the addition of 10  $\mu\text{M}$   $\text{Pb}^{2+}$ .

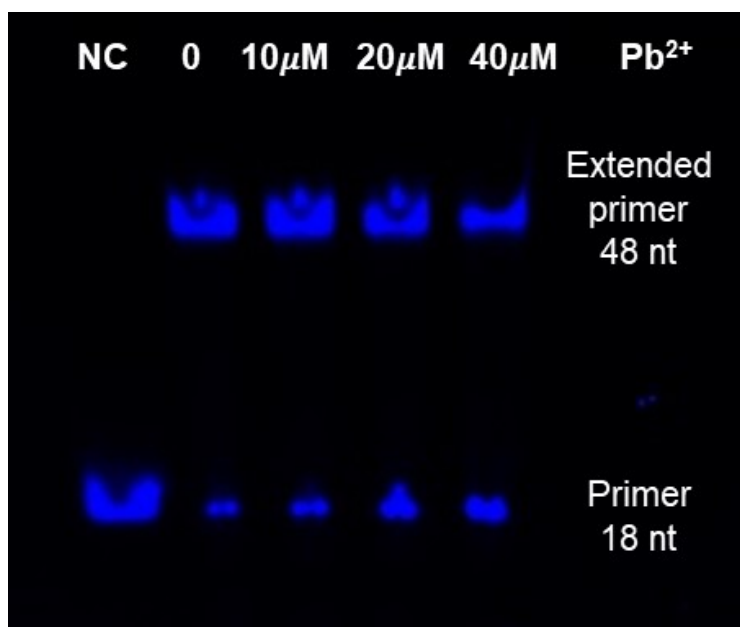

**Fig. S3.** Effect of  $\text{Pb}^{2+}$  ions on Taq DNA polymerase activity. To test if  $\text{Pb}^{2+}$  by itself can hamper the intrinsic enzymatic activity of Taq DNA polymerase, we added diverse concentrations of  $\text{Pb}^{2+}$  to polymerase and quantified the amount of extended primers.

Compared to the activity of polymerase without  $\text{Pb}^{2+}$ , the addition of  $10 \mu\text{M}$   $\text{Pb}^{2+}$  gave no change in the ability of the polymerase to extend the primers. However, the addition of  $20 \mu\text{M}$  and  $40 \mu\text{M}$  of  $\text{Pb}^{2+}$  slightly reduced the total amount of the extended primers, which means that there is somehow weak suppression of polymerase activity. For this reason, we decided to use  $10 \mu\text{M}$  (final concentration) of  $\text{Pb}^{2+}$  to trigger the reaction of our molecular switches.

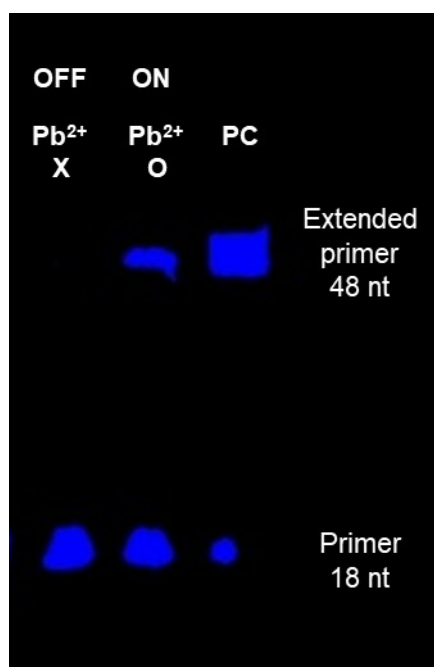

**Fig. S4.** Operation of the OFF $\rightarrow$ ON switch upon  $\text{Pb}^{2+}$  addition. We tested the performance of our OFF $\rightarrow$ ON switch by quantitatively comparing the amount of extended FAM-primers before and after the addition of  $\text{Pb}^{2+}$ . Establishing positive control (PC) as the percentage of the extended FAM-primer in the absence of our OFF $\rightarrow$ ON switch, we calculated the relative band intensity at each condition to derive the amplicon production change (%). In presence of our OFF $\rightarrow$ ON switch, the signal change greatly increased from 2.45 % (OFF) to 48.74 % (ON) upon  $10 \mu\text{M}$   $\text{Pb}^{2+}$  addition, which means the proper operation of our switch to recover the DNA polymerase activity.

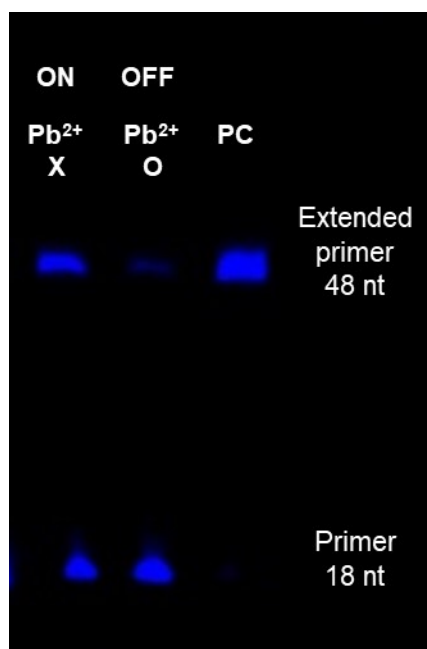

**Fig. S5.** Operation of the ON→OFF switch upon Pb<sup>2+</sup> addition. In the same way as Figure S3, we calculated the amplicon production change (%) before and after adding 10 μM of Pb<sup>2+</sup>. In presence of our ON→OFF switch, the signal change decreased from 54.84 % (ON) to 16.45 % (OFF) upon 10 μM Pb<sup>2+</sup> addition, confirming the proper function of our switch.

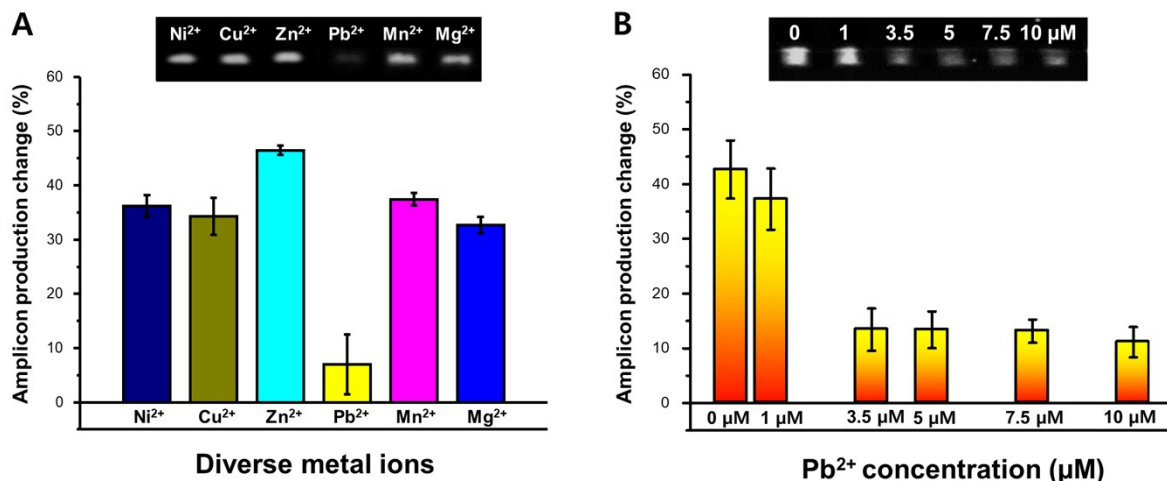

**Fig. S6.** Pb<sup>2+</sup> specificity and concentration dependence for the ON→OFF switch. **A)** High Pb<sup>2+</sup> specificity in operating the ON→OFF switch. Among diverse metal ions (Ni<sup>2+</sup>, Cu<sup>2+</sup>, Zn<sup>2+</sup>, Pb<sup>2+</sup>, Mn<sup>2+</sup>, and Mg<sup>2+</sup>), only Pb<sup>2+</sup> could induce the deactivation of DNA polymerase. **B)** By varying Pb<sup>2+</sup> concentrations, the ON→OFF switch could control the degree of isothermal amplification by DNA polymerases.

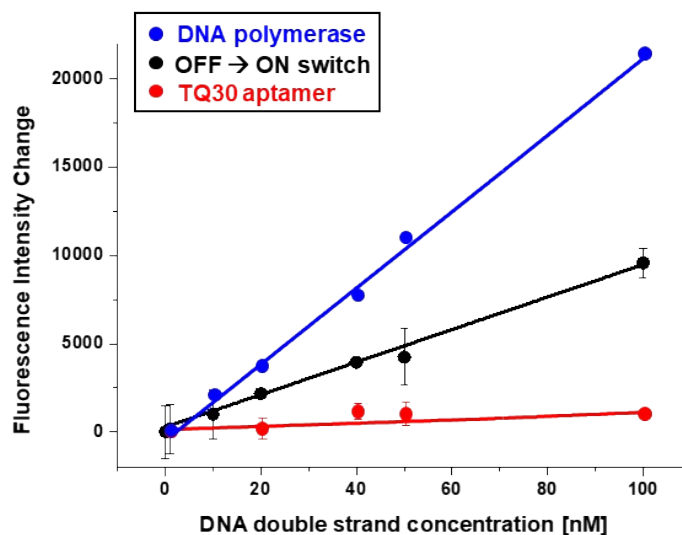

**Fig. S7.** Positive (blue) and negative (red) control experiments for quantification of HPV type 16 DNA in 5% human serum. For the positive control experiment, only DNA polymerase was applied without the OFF→ON switch. There was a strong linear relationship between the

HPV16 DNA concentration and the fluorescence intensity change, but the slope of the positive control (217.5/nM) was steeper than that of the OFF→ON switch (92.1/nM), indicating the lowered activity of DNA polymerase in the presence of the DNAzymatic switch. For the negative control experiment, the TQ30 aptamer was applied instead of the OFF→ON switch, and there was almost no increment of fluorescence intensity over varied DNA double strand concentrations.

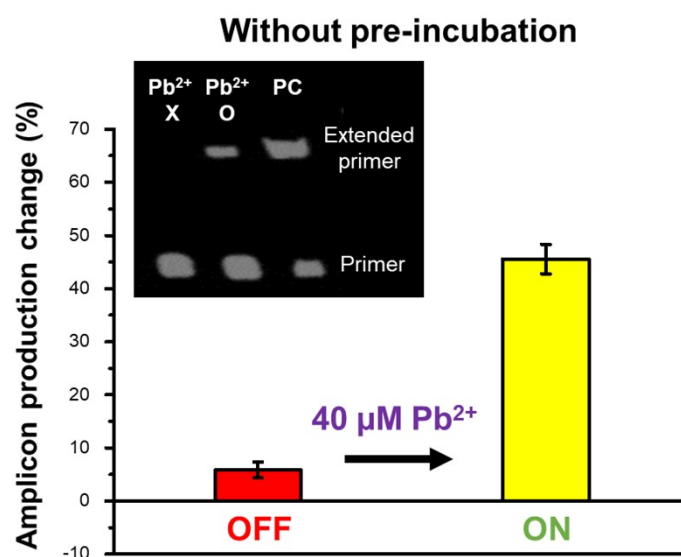

**Fig. S8.** The OFF→ON switch works well without  $\text{Pb}^{2+}$ -induced pre-cleavage. In allowing  $\text{Pb}^{2+}$  to immediately initiate the isothermal amplification reaction, 300 nM OFF→ON switch was mixed with Taq DNA polymerase, Taq buffer, dNTPs, template, and primer all at once, and 40  $\mu\text{M}$   $\text{Pb}^{2+}$  was added at last. As a result, a similar level of amplicon production change was observed by  $\text{Pb}^{2+}$  addition compared to that by pre-incubation (see Fig. 2A, middle). However, the background level was slightly higher, and a relatively large amount of  $\text{Pb}^{2+}$  was needed.



## References

- [1] C. Dang, S.D. Jayasena, Oligonucleotide inhibitors of TaqDNA polymerase facilitate detection of low copy number targets by PCR, *J. Mol. Biol.* 264 (1996) 268-278.
- [2] R. Saran, J. Liu, A comparison of two classic Pb<sup>2+</sup>-dependent RNA-cleaving DNazymes, *Inorg. Chem. Front.* 3 (2016) 494-501.
- [3] K.S. Park, C.Y. Lee, H.G. Park, Target DNA induced switches of DNA polymerase activity, *Chem. Commun.* 51 (2015) 9942-9945.
- [4] K.S. Park, C.Y. Lee, H.G. Park, Metal ion triggers for reversible switching of DNA polymerase, *Chem. Commun.* 52 (2016) 4868-4871.
